# Supplementary material for: Prevalence and Genetic Diversity of Toxin Genes in Clinical Isolates of Clostridium perfringens: Coexistence of Alpha-Toxin Variant and Binary Enterotoxin Genes (bec/cpile)
Source: MDPI journal article supplement (doi:10.3390/toxins11060326), 2019-06-06
Supplement: s1 [file s1]

**Figure S3 Alignment 834-bp insertion sequence and amino acid sequence of alpha-toxin variant**

**(a)** Alignment of 834-bp insertion sequences in *plc* identified in strains S03 [16], CPBC16ML [17], and CP653 in the present study. Asterisk indicates identical nucleotide.

|              |                                                               |     |
|--------------|---------------------------------------------------------------|-----|
| Ins-S03      | GTGCGAGACGTTTCATAGTTGAAAAGACTATGCACATTCTAAATATAAGAGAATGGAGAAC | 60  |
| Ins-CP653    | GTGCGAGACGTTTCATAGTTGAAAAGACTATGCACATTCTAAATATAAGAGAATGGAGAAC | 60  |
| Ins-CPBC16ML | GTGCGAGACGTTTCATAGTTGAAAAGACTATGCACATTCTAAATATAAGAGAATGGAGAAC | 60  |
| *****        |                                                               |     |
| Ins-S03      | TCTTAACCTGAAAAGTGAATGATAGGGTAACGCCTTGAAACGCTTTCTCTAATACTCCG   | 120 |
| Ins-CP653    | TCTTAACCTGAAAAGTGAATGATAGGGTAACGCCTTGAAACGCTTTCTCTAATACTCCG   | 120 |
| Ins-CPBC16ML | TCTTAACCTGAAAAGTGAATGATAGGGTAACGCCTTGAAACGCTTTCTCTAATACTCCG   | 120 |
| *****        |                                                               |     |
| Ins-S03      | ACATGCAGTAACCTATGTGTGAAAGTTATTGTGTGAAGCTCGGTGAAGTCGGCAGAAAATT | 180 |
| Ins-CP653    | ACATGCAGTAACCTATGTGTGAAAGTTATTGTGTGAAGCTCGGTGAAGTCGGCAGAAAATT | 180 |
| Ins-CPBC16ML | ACATGCAGTAACCTATGTGTGAAAGTTATTGTGTGAAGCTCGGTGAAGTCGGCAGAAAATT | 180 |
| *****        |                                                               |     |
| Ins-S03      | ACCGTAATAGATAATATTATCTAACGAAAGTGTTCTAGAGGTAGAATATGTAGTTGATAT  | 240 |
| Ins-CP653    | ACCGTAATAGATAATATTATCTAACGAAAGTGTTCTAGAGGTAGAATATGTAGTTGATAT  | 240 |
| Ins-CPBC16ML | ACCGTAATAGATAATATTATCTAACGAAAGTGTTCTAGAGGTAGAATATGTAGTTGATAT  | 240 |
| *****        |                                                               |     |
| Ins-S03      | GCCGGGAGTCGTTAAAAACAGAATATGGTGAGAATGTTCCAATAGGAACTGACGAACTGG  | 300 |
| Ins-CP653    | GCCGGGAGTCGTTAAAAACAGAATATGGTGAGAATGTTCCAATAGGAACTGACGAACTGG  | 300 |
| Ins-CPBC16ML | GCCGGGAGTCGTTAAAAACAGAATATGGTGAGAATGTTCCAATAGGAACTGACGAACTGG  | 300 |
| *****        |                                                               |     |
| Ins-S03      | CGAAGGTACGCTCCTAAGCTATAAATATAGAAATATTAATAAATTGGTTTGAGGATTA    | 360 |
| Ins-CP653    | CGAAGGTACGCTCCTAAGCTATAAATATAGAAATATTAATAAATTGGTTTGAGGATTA    | 360 |
| Ins-CPBC16ML | CGAAGGTACGCTCCTAAGCTATAAATATAGAAATATTAATAAATTGGTTTGAGGATTA    | 360 |
| *****        |                                                               |     |
| Ins-S03      | GTAAGAATAGTACCCATGAAAATCCTTGATATGTTATAGGCATATAATAAGCCAATGGGG  | 420 |
| Ins-CP653    | GTAAGAATAGTACCCATGAAAATCCTTGATATGTTATAGGCATATAATAAGCCAATGGGG  | 420 |
| Ins-CPBC16ML | GTAAGAATAGTACCCATGAAAATCCTTGATATGTTATAGGCATATAATAAGCCAATGGGG  | 420 |
| *****        |                                                               |     |
| Ins-S03      | TAAAGTCAGCACCTAAGTTCTAGTATTGATAAAGTTAAGGGAACGTCGAAAGCTAAAGAC  | 480 |
| Ins-CP653    | TAAAGTCAGCACCTAAGTTCTAGTATTGATAAAGTTAAGGGAACGTCGAAAGCTAAAGAC  | 480 |
| Ins-CPBC16ML | TAAAGTCAGCACCTAAGTTCTAGTATTGATAAAGTTAAGGGAACGTCGAAAGCTAAAGAC  | 480 |
| *****        |                                                               |     |
| Ins-S03      | GTGGAGGATACACACCTATGAAGCGAAGAAAGGGAATACATAACCTTTCATAATCTTTAG  | 540 |
| Ins-CP653    | GTGGAGGATACACACCTATGAAGCGAAGAAAGGGAATACATAACCTTTCATAATCTTTAG  | 540 |
| Ins-CPBC16ML | GTGGAGGATACACACCTATGAAGCGAAGAAAGGGAATACATAACCTTTCATAATCTTTAG  | 540 |
| *****        |                                                               |     |
| Ins-S03      | TGAGAGTAGTGGCATGACTGATGAAGATTTTGTAAATGAAATTGGAGGAATAGCCACAAGT | 600 |
| Ins-CP653    | TGAGAGTAGTGGCATGACTGATGAAGATTTTGTAAATGAAATTGGAGGAATAGCCACAAGT | 600 |
| Ins-CPBC16ML | TGAGAGTAGTGGCATGACTGATGAAGATTTTGTAAATGAAATTGGAGGAATAGCCACAAGT | 600 |
| *****        |                                                               |     |
| Ins-S03      | CAATTATTTATTTAAAAGAACTTAATCAATTCATGGATTCTAGTAAGATAAAAAAGGTCA  | 660 |
| Ins-CP653    | CAATTATTTATTTAAAAGAACTTAATCAATTCATGGATTCTAGTAAGATAAAAAAGGTCA  | 660 |
| Ins-CPBC16ML | CAATTATTTATTTAAAAGAACTTAATCAATTCATGGATTCTAGTAAGATAAAAAAGGTCA  | 660 |
| *****        |                                                               |     |
| Ins-S03      | CTGAATATAGAAAATTAGTGATAGACCATGGCAAGATATTTATATTAATACTTGAGATTA  | 720 |
| Ins-CP653    | CTGAATATAGAAAATTAGTGATAGACCATGGCAAGATATTTATATTAATACTTGAGATTA  | 720 |
| Ins-CPBC16ML | CTGAATATAGAAAATTAGTGATAGACCATGGCAAGATATTTATATTAATACTTGAGATTA  | 720 |
| *****        |                                                               |     |

|              |                                                              |     |
|--------------|--------------------------------------------------------------|-----|
| Ins-S03      | AGAAAAATGAATTTAATATATACTTGATGGAACGCCGTATGCGGTGAAAGTCGCACGTAC | 780 |
| Ins-CP653    | AGAAAAATGAATTTAATATATACTTGATGGAACGCCGTATGCGGTGAAAGTCGCACGTAC | 780 |
| Ins-CPBC16ML | AGAAAAATGAATTTAATATATACTTGATGGAACGCCGTATGCGGTGAAAGTCGCACGTAC | 780 |
|              | *****                                                        |     |
| Ins-S03      | GGTGTGGAGCGGGGGAAAAATTGGAGATAACATCAAAGATTACCTATCGCTAT        | 834 |
| Ins-CP653    | GGTGTGGAGCGGGGGAAAAATTGGAGATAACATCAAAGATTACCTATCGCTAT        | 834 |
| Ins-CPBC16ML | GGTGTGGAGCGGGGGAAAAATTGGAGATAACATCAAAGATTACCTATCGCTAT        | 834 |
|              | *****                                                        |     |

(b) Alignment of deduced, spliced amino acid sequences of alpha-toxin in strains S03 and CP653. These sequences are translated through splicing from the original *plc* gene of strains S03 and CP653 (S03-spl, CP653-spl, respectively). Asterisk indicates identical amino acid. Different amino acids are shown in red.

|           |                                                                 |     |
|-----------|-----------------------------------------------------------------|-----|
|           | Signal peptide                                                  |     |
| S03-spl   | MKRKICKALICAALATSLWAGASTKVYAWDGKIDGTGTHAMIVTQGVSIENDLSKNEPE     | 60  |
| CP653-spl | MKRKICKALICAALATSLWAGASTKVYAWDGKIDGTGTHAMIVTQGVSIENDLSKNEPE     | 60  |
|           | *****                                                           |     |
| S03-spl   | SVRKNLEILKENMHELQLGSTYPDYDKNAYDLYQDHFWDPTDNNFSKDNSWYLAYSIPD     | 120 |
| CP653-spl | SVRKNLEILKENMHELQLGSTYPDYDKNAYDLYQDHFWDPTDNNFSKDNSWYLAYSIPD     | 120 |
|           | *****                                                           |     |
| S03-spl   | TGESQIRKFSALARYEWQRGNYKQATFYLGEMHYFGDIDTPYHPANVTAVDSAGHVKFE     | 180 |
| CP653-spl | TGESQIRKFSALARYEWQRGNYKQATFYLGEMHYFGDIDTPYHPANVTAVDSAGHVKFE     | 180 |
|           | *****                                                           |     |
| S03-spl   | TFAERKEQYKINTAGCKTNEAFYTDILKNKDFNAWSKEYARGFAKTGKSIYYSHASMSH     | 240 |
| CP653-spl | TFAERKEQYKINTAGCKTNEAFYTDILKNKDFNAWSKEYARGFAKTGKSIYYSHASMSH     | 240 |
|           | *****                                                           |     |
| S03-spl   | SWDWDYAAKVTLAN SQKGTAGYIYRFLHDVSEGN DPSVGKNVKELVAYISTSGEKDAGT   | 300 |
| CP653-spl | SWDYWDYAAKVTLAN SQKGTAGYIYRFLHDVSEGN DPSVGKNVKELVAYISTSGEKDAGT  | 300 |
|           | *** *****                                                       |     |
| S03-spl   | DDYMYFGIKTKDGKTQEWEMDNP GDNFMTGSKD TYTFKLK DENLKIDDIQNMWIRKRKYT | 360 |
| CP653-spl | DDYMYFGIKTKDGKTQEWEMDNP GDNFMTGSKD TYTFKLK DENLKIDDIQNMWIRKRKYT | 360 |
|           | *****                                                           |     |
| S03-spl   | AFSDAYKPENIKIIANGKVVVDKDIN EWISGNSTYNIK                         | 398 |
| CP653-spl | ASDAYKPENIKIIANGKVVVDKDIN EWISGNSTYNIK                          | 398 |
|           | * *****                                                         |     |
