# Supplementary material for: Prevalence and Genetic Diversity of Toxin Genes in Clinical Isolates of Clostridium perfringens: Coexistence of Alpha-Toxin Variant and Binary Enterotoxin Genes (bec/cpile)
Source: MDPI journal article supplement (doi:10.3390/toxins11060326), 2019-06-06
Supplement: s1 [file s1]

# **Figure S7 Alignment of BECa/CPILE-ab amino acid sequences**

(a) Amino acid sequence alignment of BECa (CPILE-a) (1) and BECb (CPILE-b) (2) of strains OS1, TS1, W5052 (GenBank accession nos. AP013033, AP13034, AB921559, respectively) and CP653 analyzed in the present study. Amino acids in CP653 proteins which are different from those of other three strains are shown in red, while asterisk indicates identical amino acid. A short loop sequence (residue 210-216) linking structurally homologous N-terminal domain and C-terminal domain is represented by shading above the sequence. Positions marked in yellow below the sequences represent common structural traits in ADP-ribosylating toxin (ADPRT)-family proteins, i.e., an aromatic residue (Y)-R/H, S-T-S motif (S-T-T in BECa/CPILE-a), an E-X-E motif in the ADP-ribosylating turn-turn (ARTT) loop underlined. Conserved amino acids associated with NADH recognition [26] are indicated by blue bars above the sequences. Loop I-V, and two protruding loops PT-I and PT-II associated with binding to actin [27] are indicated by green and red boxes, respectively.

## (1) BECa / CPILE-a

|       |                                                               |     |
|-------|---------------------------------------------------------------|-----|
| CP653 | MLDDNRPMDFAKDKNSATLWAKKRKQVWLNLSKAESTSIDNYIKNSSEINSYSIKKKFA   | 60  |
| OS1   | MLDDNRPMDFAKDKNSATLWAKKRKQVWLNLSKAESTSINNYIKNSSEINSYSIKKKFA   | 60  |
| TS-1  | MLDDNRPMDFAKDKNSATLWAKKRKQVWLNLSKAESTSINNYIKNSSEINSYSIKKKFA   | 60  |
| W5052 | MLDDNRPMDFAKDKNSATLWAKKRKQVWLNLSKAESTSINNYIKNSSEINSYSIKKKFA   | 60  |
|       | *****:*****:*****                                             |     |
|       | α1 α2                                                         |     |
| CP653 | LDNYEGIETLNEDLKNISTSVKKSMLTKPLYVYYYETNDKFGFNQNLLESSLDSNIIDDEA | 120 |
| OS1   | LDNYEGIETLNEDLKNISTAVKKSMLTKPLYVYYYEANDKFGFNQNLLESSLDSNIIDEEA | 120 |
| TS-1  | LDNYEGIETLNEDLKNISTAVKKSMLTKPLYVYYYEANDKFGFNQNLLESSLDSNIIDEEA | 120 |
| W5052 | LDNYEGIETLNEDLKNISTAVKKSMLTKPLYVYYYEANDKFGFNQNLLESSLDSNIIDEEA | 120 |
|       | *****:*****:*****                                             |     |
|       | loop I α3 β1                                                  |     |
| CP653 | INNFAKKISDTNFIQDGFKDVNMTEPDINSKLPILVHLKLPTNTPAASYGNDEENLRVLI  | 180 |
| OS1   | INNFAKKISDTNFIQDGFKDVMTTEPDINSKLPILVHLKLPTNTPAASYGNDEENLRVLI  | 180 |
| TS-1  | INNFAKKISDTNFIQDGFKDVMTTEPDINSKLPILVHLKLPTNTPAASYGNDEENLRVLI  | 180 |
| W5052 | INNFAKKISDTNFIQDGFKDVMTTEPDINSKLPILVHLKLPTNTPAASYGNDEENLRVLI  | 180 |
|       | *****:*****:*****                                             |     |
|       | α4 β2 β3 β4                                                   |     |
|       | N-terminal domain ← → C-terminal domain                       |     |
| CP653 | DQGYSLKATGLSIVTIKKGQYAKVDADLIKQLNFENDVISASQWGEENYAPWLKELTSNE  | 240 |
| OS1   | DQGYSLKATGLSIVTIKKGQYAKVDADLIKQLNFENDVISASQWGEENYAPWLKELTSNE  | 240 |
| TS-1  | DQGYSLKATGLSIVTIKKGQYAKVDADLIKQLNFENDVISASQWGEENYAPWLKELTSNE  | 240 |
| W5052 | DQGYSLKATGLSIVTIKKGQYAKVDADLIKQLNFENDVISASQWGEENYAPWLKELTSNE  | 240 |
|       | *****:*****:*****                                             |     |
| CP653 | LRDINNYLGGGYTAINKYLLDGTIGENTSKEDEEEKISNISSALKKKKIPEDIITYRRMG  | 300 |
| OS1   | LRDINNYLGGGYTAINKYLLDGTIGENTSKEDEEEKISNISSALKKKRKIPEDIITYRRMG | 300 |
| TS-1  | LRDINNYLGGGYTAINKYLLDGTIGENTSKEDEEEKISNISSALKKKRKIPEDIITYRRMG | 300 |
| W5052 | LRDINNYLGGGYTAINKYLLDGTIGENTSKEDEEEKISNISSALKKKRKIPEDIITYRRMG | 300 |
|       | *****:*****:*****                                             |     |
|       | loop II PT-I Aromatic residue (Y)-R/H                         |     |
| CP653 | PNEFGLDLNSPDYDFNKVENVSKFKEKWLGKTIPVKTFISTTVLSNNISAFAKRKLILRL  | 360 |
| OS1   | PNEFGLDLNSPDYDFNKVENVSKFKEKWLGKTIPVKTFISTTVLSNNISAFAKRKLILRL  | 360 |
| TS-1  | PNEFGLDLNSPDYDFNKVENVSKFKEKWLGKTIPVKTFISTTVLSNNISAFAKRKLILRL  | 360 |
| W5052 | PNEFGLDLNSPDYDFNKVENVSKFKEKWLGKTIPVKTFISTTVLSNNISAFAKRKLILRL  | 360 |
|       | *****:*****:*****                                             |     |
|       | loop III S-T-S motif loop IV                                  |     |
| CP653 | HLPNGSNAAYVSVAEGYKNEYEVLIDHGYSYKIDNITEYDESSLGGKTNKLIIDATLI    | 419 |
| OS1   | HLPNGSNAAYVSVAEGYKNEYEVLIDHGYSYKIDNITEYDESSLGGKTNKLIIDATLI    | 419 |
| TS-1  | HLPNGSNAAYVSVAEGYKNEYEVLIDHGYSYKIDNITEYDESSLGGKTNKLIIDATLI    | 419 |
| W5052 | HLPNGSNAAYVSVAEGYKNEYEVLIDHGYSYKIDNITEYDESSLGGKTNKLIIDATLI    | 419 |
|       | ***:*****:*****                                               |     |
|       | ARTT loop (E-X-E motif) / loop V PT-II                        |     |



|       |                                                              |     |
|-------|--------------------------------------------------------------|-----|
| CP653 | IPYLKYFPKIGLRAFVNGIYKDLGLRFKNHDGHKTI LPTDYTDSPVKIDQFEVYVIDQY | 780 |
| TS1   | IPFLKYFPQIGLRAFVNGIYKDLGLRLRNHDGYKTIITPADYTNSPVQIDQFEVYVIDQY | 780 |
| OS1   | IPFLKYFPQIGLRAFVNGIYKDLGLRLRNHDGYKTIITPADYTNSPVQIDQFEVYVIDQY | 780 |
| W5052 | IPFLKYFPQIGLRAFVNGIYKDLGLRLRNHDGYKTIITPADYTNSPVQIDQFEVYVIDQY | 780 |

\*\*:\*\*\*\*\*:\*\*\*\*\*:\*\*\*\*\*:\*\*\*\*\*:\*\*\*:\*\*\*:\*\*\*:\*\*\*:\*\*\*\*\*

|       |                     |     |
|-------|---------------------|-----|
| CP653 | GDPLTLFTSKDTIVLKYPF | 799 |
| TS1   | GDPLTLFTSKDTIVLEYPF | 799 |
| OS1   | GDPLTLFTSKDTIVLEYPF | 799 |
| W5052 | GDPLTLFTSKDTIVLEYPF | 799 |

\*\*\*\*\*:\*\*\*
