# Supplementary material for: Prevalence and Genetic Diversity of Toxin Genes in Clinical Isolates of Clostridium perfringens: Coexistence of Alpha-Toxin Variant and Binary Enterotoxin Genes (bec/cpile)
Source: MDPI journal article supplement (doi:10.3390/toxins11060326), 2019-06-06
Supplement: s1 [file s1]

**Figure S1** Alignment of alpha-toxin amino acid sequences representing toxin types F, I, IVb, IVc, IVd, V, Vd, Ve, Vf, Vg, and VIII. Asterisk indicates identical amino acid. Residues that are different from those of type F are shown in red. The central loop domain which mediates interaction with ganglioside GM1a is marked in blue in the bottom line, and its key residues are indicated with vertical bars. Shadowed portion above the sequence indicates C-domain (membrane-binding region), in which critical amino acid sites for binding of toxin are marked with #.

|      | Signal peptide                                               |     |
|------|--------------------------------------------------------------|-----|
| F    | MKRKICKALICATLATSLWAGASTKYYAWDGKIDGTGTHAMIVTQGVSIENDLSKNEPE  | 60  |
| I    | MKRKICKALICAALATSLWAGASTKYYAWDGKIDGTGTHAMIVTQGVSIENDLSKNEPE  | 60  |
| VIII | MKRKICKALICATLATSLWAGASTKYYAWDGKIDGTGTHAMIVTQGVSIENDLSKNEPE  | 60  |
| IVd  | MKRKICKALICAALATSLWAGASTKYYAWDGKIDGTGTHAMIVTQGVSIENDLSKNEPE  | 60  |
| IVc  | MKRKICKALICAALATSLWAGASTKYYAWDGKIDGTGTHAMIVTQGVSIENDLSKSEPE  | 60  |
| IVb  | MKRKICKALICAALATSLWAGASTKYYAWDGKIDGTGTHAMIVTQGVSIENDLSKNEPE  | 60  |
| Vg   | MKRKICKALICAALATSLWAGASTKYYAWDGKIDGTGTHAMIVTQGVSIENDLSKNEPE  | 60  |
| Vd   | MKRKICKALICAALATSLWAGASTKYYAWDGKIDGTGTHAMIVTQGVSIENDLSKNEPE  | 60  |
| Ve   | MKRKICKALICAALATSLWAGASTKYYAWDGKIDGTGTHAMIVTQGVSIENDLSKNEPE  | 60  |
| V    | MKRKICKALICAALATSLWAGASTKYYAWDGKIDGTGTHAMIVTQGVSIENDLSKNEPE  | 60  |
| Vf   | MKRKICKALICAALATSLWAGASTKYYAWDGKIDGTGTHAMIVTQGVSIENDLSKNEPE  | 60  |
|      | *****.*****:***                                              |     |
|      |                                                              |     |
| F    | SVRKNLEILKENMHLEQLGSTYPDYDKNAYDLYQDHFWDPTDNNFSKDNSWYLAYSIPD  | 120 |
| I    | SVRKNLEILKENMHLEQLGSTYPDYDKNAYDLYQDHFWDPTDNNFSKDNSWYLAYSIPD  | 120 |
| VIII | SVRKNLEILKENMHLEQLGSTYPDYDKNAYDLYQDHFWDPTDNNFSKDNSWYLAYSIPD  | 120 |
| IVd  | SVRKNLEILKENMHLEQLGSTYPDYDKNAYDLYQDHFWDPTDNNFSKDNSWYLAYSIPD  | 120 |
| IVc  | SVRKNLEILKENMHLEQLGSTYPDYDKNAYDLYQDHFWDPTDNNFSKDNSWYLAYSIPD  | 120 |
| IVb  | SVRKNLEILKENMHLEQLGSTYPDYDKNAYDLYQDHFWDPTDNNFSKDNSWYLAYSIPD  | 120 |
| Vg   | SVRKNLEILKENMHLEQLGSTYPDYDKNAYDLYQDHFWDPTDNNFSKDNSWYLAYSIPD  | 120 |
| Vd   | SVRKNLEILKENMHLEQLGSTYPDYDKNAYDLYQDHFWDPTDNNFSKDNSWYLAYSIPD  | 120 |
| Ve   | SVRKNLEILKENMHLEQLGSTYPDYDKNAYDLYQDHFWDPTDNNFSKDNSWYLAYSIPD  | 120 |
| V    | SVRKNLEILKENMHLEQLGSTYPDYDKNAYDLYQDHFWDPTDNNFSKDNSWYLAYSIPD  | 120 |
| Vf   | SVRKNLEILKENMHLEQLGSTYPDYDKNAYDLYQDHFWDPTDNNFSKDNSWYLAYSIPD  | 120 |
|      | *****                                                        |     |
|      |                                                              |     |
| F    | TGESQIRKFSALARYEWQRGNYKQATFYLGAMHYFGDIDTPYHPANVTAVDSAGHVKFE  | 180 |
| I    | TGESQIRKFSALARYEWQRGNYKQATFYLGAMHYFGDIDTPYHPANVTAVDSAGHVKFE  | 180 |
| VIII | TGESQIRKFSALARYEWQRGNYKQATFYLGAMHYFGDIDTPYHPANVTAVDSAGHVKFE  | 180 |
| IVd  | TGESQIRKFSALARYEWQRGNYKQATFYLGAMHYFGDIDTPYHPANVTAVDSAGHVKFE  | 180 |
| IVc  | TGESQIRKFSALARYEWQRGNYKQATFYLGAMHYFGDIDTPYHPANVTAVDSAGHVKFE  | 180 |
| IVb  | TGESQIRKFSALARYEWQRGNYKQATFYLGAMHYFGDIDTPYHPANVTAVDSAGHVKFE  | 180 |
| Vg   | TGESQIRKFSALARYEWQRGNYKQATFYLGAMHYFGDIDTPYHPANVTAVDSAGHVKFE  | 180 |
| Vd   | TGESQIRKFSALARYEWQRGNYKQATFYLGAMHYFGDIDTPYHPANVTAVDSAGHVKFE  | 180 |
| Ve   | TGESQIRKFSALARYEWQRGNYKQATFYLGAMHYFGDIDTPYHPANVTAVDSAGHVKFE  | 180 |
| V    | TGESQIRKFSALARYEWQRGNYKQATFYLGAMHYFGDIDTPYHPANVTAVDSAGHVKFE  | 180 |
| Vf   | TGESQIRKFSALARYEWQRGNYKQATFYLGAMHYFGDIDTPYHPANVTAVDSAGHVKFE  | 180 |
|      | *****                                                        |     |
|      |                                                              |     |
| F    | TFAEERKEQYKINTAGCKTNEDFYADILKNKDFNAWSKEYARGFAKTGKSIYYSHASMSH | 240 |
| I    | TFAEERKEQYKINTAGCKTNEDFYADILKNKDFNAWSKEYARGFAKTGKSIYYSHASMSH | 240 |
| VIII | TFAEERKEQYKINTAGCKTNEDFYADILKNKDFNAWSKEYARGFAKTGKSIYYSHASMSH | 240 |
| IVd  | TFAEERKEQYKINTAGCKTNEDFYADILKNKDFNAWSKEYARGFAKTGKSIYYSHASMSH | 240 |
| IVc  | TFAEERKEQYKINTAGCKTNEDFYADILKNKDFNAWSKEYARGFAKTGKSIYYSHASMSH | 240 |
| IVb  | TFAEERKEQYKINTAGCKTNEDFYADILKNKDFNAWSKEYARGFAKTGKSIYYSHASMSH | 240 |
| Vg   | TFAEERKEQYKINTAGCKTNEAFYTDILKNKDFNAWSKEYARGFAKTGKSIYYSHASMSH | 240 |
| Vd   | TFAEERKEQYKINTAGCKTNEAFYTDILKNKDFNAWSKEYARGFAKTGKSIYYSHASMSH | 240 |
| Ve   | TFAEERKEQYKINTAGCKTNEAFYTDILKNKDFNAWSKEYARGFAKTGKSIYYSHASMSH | 240 |
| V    | TFAEERKEQYKINTAGCKTNEAFYTDILKNKDFNAWSKEYARGFAKTGKSIYYSHASMSH | 240 |
| Vf   | TFAEERKEQYKINTAGCKTNEAFYTDILKNKDFNAWSKEYARGFAKTGKSIYYSHASMSH | 240 |
|      | ***** **                                                     |     |

|      |                                                                             |     |
|------|-----------------------------------------------------------------------------|-----|
| F    | SWDDWDYAAKVTLAN SQKGTAGYIYRFLHDVSEGN DPSVGKNVKELVAYISTSGEKDAGT              | 300 |
| I    | SWDDWDYAAKVTLAN SQKGTAGYIYRFLHDVSEGN DPSVGKNVKELVAYISTSGEKDAGT              | 300 |
| VIII | SWDDWDYAAKVTLAN SQKGTAGYIYRFLHDVSEGN DPSVGKNVKELVAYISTSGEKDAGT              | 300 |
| IVd  | SWDDWDYAAKVTLAN SQKGTAGYIYRFLHDVSEGN DPSVGKNVKELVAYISTSGEKDAGT              | 300 |
| IVc  | SWDDWDYAAKVTLAN SQKGTAGYIYRFLHDVSEGN DPSVGKNVKELVAYISTSGEKDAGT              | 300 |
| IVb  | SWDDWDYAAKVTLAN SQKGTAGYIYRFLHDVSEGN DPSVGKNVKELVAYISTSGEKDAGT              | 300 |
| Vg   | SWD <del>Y</del> WDYAAKVTLAN SQKGTAGYIYRFLHDVSEGN DPSVGKNVKELVAYISTSGEKDAGT | 300 |
| Vd   | SWDDWDYAAKVTLAN SQKGTAGYIYRFLHDVSEGN DPSVGKNVKELVAYISTSGEKDAGT              | 300 |
| Ve   | SWDDWDYAAKVTLAN SQKGTAGYIYRFLHDVSEGN DPSVGKNVKELVAYISTSGEKDAGT              | 300 |
| V    | SWDDWDYAAKVTLAN SQKGTAGYIYRFLHDVSEGN DPSVGKNVKELVAYISTSGEKDAGT              | 300 |
| Vf   | SWDDWDYAAKVTLAN SQKGTAGYIYRFLHDVSEGN DPSVGKNVKELVAYISTSGEKDAGT              | 300 |

\*\*\* \*\*\*\*\*

|      |                                                            |   |     |
|------|------------------------------------------------------------|---|-----|
|      | #                                                          | # | #   |
| F    | DDYMYFGIKTKDGKTQEWMDNPGNDFMTGSKDTYTFKLKDENLKIDDIQNMWIRKRYT |   | 360 |
| I    | DDYMYFGIKTKDGKTQEWMDNPGNDFMTGSKDTYTFKLKDENLKIDDIQNMWIRKRYT |   | 360 |
| VIII | DDYMYFGIKTKDGKTQEWMDNPGNDFMTGSKDTYTFKLKDENLKIDDIQNMWIRKRYT |   | 360 |
| IVd  | DDYMYFGIKTKDGKTQEWMDNPGNDFMTGSKDTYTFKLKDENLKIDDIQNMWIRKRYT |   | 360 |
| IVc  | DDYMYFGIKTKDGKTQEWMDNPGNDFMTGSKDTYTFKLKDENLKIDDIQNMWIRKRYT |   | 360 |
| IVb  | DDYMYFGIKTKDGKTQEWMDNPGNDFMTGSKDTYTFKLKDENLKIDDIQNMWIRKRYT |   | 360 |
| Vg   | DDYMYFGIKTKDGKTQEWMDNPGNDFMTGSKDTYTFKLKDENLKIDDIQNMWIRKRYT |   | 360 |
| Vd   | DDYMYFGIKTKDGKTQEWMDNPGNDFMTGSKDTYTFKLKDENLKIDDIQNMWIRKRYT |   | 360 |
| Ve   | DDYMYFGIKTKDGKTQEWMDNPGNDFMTGSKDTYTFKLKDENLKIDDIQNMWIRKRYT |   | 360 |
| V    | DDYMYFGIKTKDGKTQEWMDNPGNDFMTGSKDTYTFKLKDENLKIDDIQNMWIRKRYT |   | 360 |
| Vf   | DDYMYFGIKTKDGKTQEWMDNPGNDFMTGSKDTYTFKLKDENLKIDDIQNMWIRKRYT |   | 360 |

\*\*\*\*\*

|      |                                                                   |     |
|------|-------------------------------------------------------------------|-----|
|      | #                                                                 |     |
| F    | AFPDAYKPENIKI IANGKVVDKDI NEWISGNSTYNIK                           | 398 |
| I    | AFPDAYKPENIKI IANGKVVDKDI NEWISGNSTYNIK                           | 398 |
| VIII | AFPDAYKPENIKI <del>V</del> IANGKVVDKDI NEWISGNSTYNIK              | 398 |
| IVd  | AFPDAYKPENIKI IANGKVVDKDI NEWISGNSTYNIK                           | 398 |
| IVc  | AFPDAYKPENIKI IANGKVVDKDI NEWISGNSTYNIK                           | 398 |
| IVb  | AFPDAYKPENIKI IANGKVVDKDI NEWISGNSTYNIK                           | 398 |
| Vg   | A <del>I</del> S <del>D</del> AYKPENIKI IANGKVVDKDI NEWISGNSTYNIK | 398 |
| Vd   | AFPD <del>V</del> YKPENIKI <del>V</del> IANGKVVDKDI NEWISGNSTYNIK | 398 |
| Ve   | AFPD <del>V</del> YKPENIKI <del>V</del> IANGKVVDKDI NEWISGNSTYNIK | 398 |
| V    | AFPDAYKPENIKI IANGKVVDKDI NEWISGNSTYNIK                           | 398 |
| Vf   | AFSDAYKPENIKI IANGKVVDKDI NEWISGNSTYNIK                           | 398 |

\*: \*. \*\*\*\*\*
