# Supplementary material for: Prevalence and Genetic Diversity of Toxin Genes in Clinical Isolates of Clostridium perfringens: Coexistence of Alpha-Toxin Variant and Binary Enterotoxin Genes (bec/cpile)
Source: MDPI journal article supplement (doi:10.3390/toxins11060326), 2019-06-06
Supplement: s1 [file s1]

**Figure S6** Alignment of beta2 toxin amino acid sequences representing cluster 1 (strain CP301) and cluster 2 (strains JGS1902, JGS1984), and prototype (CWC412) and prototype-related isolate CP412. Asterisk indicates identical amino acid.

```

CP412      MKKIISKVTVIFMFSCFLIVGAISPMKASAKEIDAYRKVMENYLNALKNYDINTVVNISE 60
CWC245     MKKIISKFTVIFMFSCFLIVGAISPMKASAKEIDAYRKVMENYLNALKNYDINTVVNISE 60
CP301      MKKIISKFTVIFMFSCFLIVGAISPMKASAKEIDTYREVMENYLNALKNYDINTIVNVSE 60
JGS1902    MKKLIVKSTMMLLFSCLLCLGIQLPNTVKANEVNKYQSVMVQYLEAFKNYDIDTIVDISK 60
JGS1984    MKKLIVKSTMMLLFSCLLCLGIQLPNTVKANEVNKYQSVMVQYLEAFKNYDIDTIVDISK 60
          ***:* * *:***:* * * . . .*:*: * . ** :*:***:***:***:***:***:

CP412      DERVNNVEQYREMLEDFKYDPNQQLKSFEILNSQKRDNKEIFNVKTEFLNGAIYDMEFTV 120
CWC245     DERVNNVEQYREMLEDFKYDPNQQLKSFEILNSQKSDNKEIFNVKTEFLNGAIYDMEFTV 120
CP301      DERVNSDEKYKEMLEEFKYDPNQQLKSFEILNSQKSDNKEIFNVKTEFMNGAIYDMKFTV 120
JGS1902    DSRAVTKEEYKNMLMEFKYDPNQQLKSYEITSSRKIDNSEIFSVKTEFLNGAIYNMEFTV 120
JGS1984    DSRAVTKEEYKNMLMEFKYDPNQQLKSYEITGSRKIDNGEIFSVMQYLEAFKNYDIDTIVDISK 120
          * . * . *:***:* ** *****:***:* * .*: * ** ** .*****:***:***:

CP412      SSKDGKLIVSNMERTKIENEGKYILTPSFRTQVCTWDELGQAIGGVYPQTYSDRFTYYA 180
CWC245     SSKDGKLIVSDMERTKVENEGKYILTPSFRTQVCTWDELAQAIGGVYPQTYSDRFTYYA 180
CP301      SSKDGKLIVSDMERTKIENEGKYILTPSFRTQVCTWDELQSIGGVDPKTYSTRFTYYA 180
JGS1902    SYIDNKLMSDMNRIAIINEGKRIPTPSFRTQVCTWDELQYIGDAVSFTRSSKFQYSS 180
JGS1984    SYIDNKLMSNMNRISIVNEGKCIPTPSFRTQVCTWDELQYIGDAVSFTRSSKFQYSS 180
          * .*:***:* * : **** * *****:***:* * . * . * * : * * :

CP412      DNILLNFRQYATSGSRDLRVEYSVVDHWMWKDDVKASQMVGQNPDSARQIRLYIEKGQS 240
CWC245     DNILLNFRQYATSGSRDLKVEYSVVDHWMWKDDVKASQMVGQNPDSARQIRLYIEKGQS 240
CP301      DNILLNFRQYATSGSRDLKVEYSVVDHWMWGDDVKASQMVGQNPDSARQIRLYIEKGQS 240
JGS1902    NTITLNFQYATSGSRSLKVKYSVVDHWWGDDIRASQWVYGENPDYARQIKLHLGSGET 240
JGS1984    NTITLNFQYATSGSRSLKVKYSVVDHWMWGDDIRASQWVYGENPDYARQIKLYLGSGET 240
          : . * *****:***:***:***:***:***:***:***:***:***:***:***:

CP412      FYKYRIRIKNFTPASLKVFGEGYCA 265
CWC245     FYKYRIRIKNFTPASIRVFGEGYCA 265
CP301      FYKYRIRIQNFTPASIKVFGEGYCA 265
JGS1902    FQNYRIKVENYTPASIRVFGEGYCY 265
JGS1984    FKNYRIKVENYTPASIKVFGEGYCY 265
          * :***:***:***:***:***:***:

```
