# Supplementary material for: Prevalence and Genetic Diversity of Toxin Genes in Clinical Isolates of Clostridium perfringens: Coexistence of Alpha-Toxin Variant and Binary Enterotoxin Genes (bec/cpile)
Source: MDPI journal article supplement (doi:10.3390/toxins11060326), 2019-06-06
Supplement: s1 [file s1]

**Figure S5 Alignment of nucleotide and amino acid sequences of CPE**

(a) Alignment of *cpe* nucleotide sequences of strains CP396 and CP859. Asterisk indicates identical nucleotide. Different nucleotides are shown in red.

```
CP396      ATGCTTAGTAACAATTTAAATCCAATGGTGTTCGAAAATGCTAAAGAAGTATTTCTTATT 60
CP859      ATGCTTAGTAACAATTTAAATCCAATGGTGTTCGAAAATGCTAAAGAAGTATTTCTTATT 60
*****

CP396      TCTGAGGATTTAAAAACCAATTAATATTACAACTCTAACTCAAATTTAAGTGATGGA 120
CP859      TCTGAGGATTTAAAAACCAATTAATATTACAACTCTAACTCAAATTTAAGTGATGGA 120
*****

CP396      TTATATGTAATAGATAAAGGAGATGGTTGGATATTAGGGGAACCTCAGTAGTTTCAAGT 180
CP859      TTATATGTAATAGATAAAGGAGATGGTTGGATATTAGGGGAACCTCAGTAGTTTCAAGT 180
*****

CP396      CAAATTCCTTAATCCTAATGAAACAGGTACCTTTAGCCAATCATTAACTAAATCTAAAGAA 240
CP859      CAAATTCCTTAATCCTAATGAAACAGGTACCTTTAGCCAATCATTAACTAAATCTAAAGAA 240
*****

CP396      GTATCTATAAATGTAAATTTTTCAGTTGGATTTACTTCTGAATTTATACAAGCATCTGTA 300
CP859      GTATCTATAAATGTAAATTTTTCAGTTGGATTTACTTCTGAATTTATACAAGCATCTGTA 300
*****

CP396      GAATATGGATTGGAATAACTATAGGAGAACAAAATACAATAGAAAGATCTGTATCTACA 360
CP859      GAATATGGATTGGAATAACTATAGGAGAACAAAATACAATAGAAAGATCTGTATCTACA 360
*****

CP396      ACTGCTGGTCCAAATGAATATGTATATTATAAGGTTTATGCAACTTATAGAAAGTATCAA 420
CP859      ACTGCTGGTCCAAATGAATATGTATATTATAAGGTTTATGCAACTTATAGAAAGTATCAA 420
*****

CP396      GCTATTAGAATTTCTCATGGTAATATCTCTGATGATGGATCAATTTATAAATTAACAGGA 480
CP859      GCTATTAGAATTTCTCATGGTAATATCTCTGATGATGGATCAATTTATAAATTAACAGGA 480
*****

CP396      ATATGGCTTAGTAAAACATCTGCAGATAGCTTAGGAAATATTGATCAAGGTTTCATTAATT 540
CP859      ATATGGCTTAGTAAAACATCTGCAGATAGCTTAGGAAATATTGATCAAGGTTTCATTAATT 540
*****

CP396      GAAACTGGTGAAAGATGTGTTTTAACAGTTCATCTACAGATATAGAAAAAGAAATCCTT 600
CP859      GAAACTGGTGAAAGATGTGTTTTAACAGTTCATCTACAGATATAGAAAAAGAAATCCTT 600
*****

CP396      GATTTAGCTGCTGCTACAGAAAGATTAAATTTAACTGATGCATTAACTCAAATCCAGCT 660
CP859      GATTTAGCTGCTGCTACAGAAAGATTAAATTTAACTGATGCATTAACTCAAATCCAGCT 660
*****

CP396      GGTAATTTATATGATTGGCGTTCTTCTAACTCATACCCTTGGACTCAAAAGCTTAATTTA 720
CP859      GGTAATTTATATGATTGGCGTTCTTCTAACTCATACCCTTGGACTCAAAAGCTTAATTTA 720
*****

CP396      CACTTAACAATTACAGCTACTGGACAAAAATATAGAATCTTAGCTAGCAAAATTGTTGAT 780
CP859      CACTTAACAATTACAGCTACTGGACAAAAATATAGAATCTTAGCTAGCAAAATTGTTGAT 780
*****

CP396      TTTAATATTTATTCAAATAATTTTAATAATCTAGTGAAATTAGAACAGTCCTTAGGTGAT 840
CP859      TTTAATATTTATTCAAATAATTTTAATAATCTAGTGAAATTAGAACAGTCCTTAGGTGAT 840
*****

CP396      GGAGTAAAAGATCATTATGTTGATATAAGCTTAGATGCTGGACAATATGTTCTTGTAATG 900
CP859      GGAGTAAAAGATCATTATGTTGATATAAGCTTAGATGCTGGACAATATGTTCTTGTAATG 900
*****

CP396      AAAGCTAATTCATCATATAGTGGAAATTACCCTTATTCAATATTATTTCAAAAATTTTAA 960
CP859      AAAGCTAATTCATCATATAGTGGAAATTACCCTTATTCAATATTATTTCAAAAATTTTAA 960
*****
```

**Figure S5 (b)** Alignment of CPE amino acid sequences of strains CP396 and CP859. Asterisk indicates identical amino acid. Different amino acid is shown in red.

```

CP396      MLSNNLPMVFENAKEVFLISEDLKTPINITNSNSNSDGLYVIDKGDGWILGEPSVVSS 60
CP859      MLSNNLPMVFENAKEVFLISEDLKTPINITNSNSNSDGLYVIDKGDGWILGEPSVVSS 60
*****

CP396      QILNPNETGTFSQSLTKSKEVSINVNFSGFTSEFIQASVEYGFGITIGEQTIERSVST 120
CP859      QILNPNETGTFSQSLTKSKEVSINVNFSGFTSEFIQASVEYGFGITIGEQTIERSVST 120
*****

CP396      TAGPNEYVYYKYATYRKYQAIRISHGNI SDDGSIYKLTGIWLSKTSADSLGNIDQSLI 180
CP859      TAGPNEYVYYKYATYRKYQAIRISHGNI SDDGSIYKLTGIWLSKTSADSLGNIDQSLI 180
*****.***

CP396      ETGERCVLTPSTDIEKEILDAAATERLNLTDALNSNPAGNLYDWRSSNSYPWTQKLN 240
CP859      ETGERCVLTPSTDIEKEILDAAATERLNLTDALNSNPAGNLYDWRSSNSYPWTQKLN 240
*****

CP396      HLTITATGQKYRILASKIVDFNIYSNNFNNLVKLEQSLGDGVKDHVVDISLDAGQYVLVM 300
CP859      HLTITATGQKYRILASKIVDFNIYSNNFNNLVKLEQSLGDGVKDHVVDISLDAGQYVLVM 300
*****

CP396      KANSSYSGNYPYSILFQKF 319
CP859      KANSSYSGNYPYSILFQKF 319
*****

```

**Figure S5 (c)** Alignment of CPE amino acid sequences of *C. perfringens* strains belonging to major and minor lineages. Two strains analyzed in the present study (CP859 and CP396) are shown in yellow. Identical amino acids among all the strains are shown by asterisk at the bottom, while amino acids different from those on the top line (strain 8-6) are indicated in purple. Three domains I, II, III are shown above the sequences. Amino acid residues 44-116 marked in blue are essential for large complex formation and cytotoxicity. Underlined portion (amino acid 290-319) that mediates binding to eukaryotic cell receptor is underlined. Amino acids in red (strain 8-6) are involved in binding to claudin-3/-4.

|                |        | II                                                            |    |
|----------------|--------|---------------------------------------------------------------|----|
| 8-6            | -----  | MLSNLNPVMVFENAKEVFLISEDLKTPINITNSNSNSDGLYVIDKGDGWILGE         | 54 |
| B3550. 5       | -----  | <u>M</u> YNNLNPVMVFENAKEVFLISEDLKTPINITNSNSNSDGLYVIDKGDGWILGE | 54 |
| F3686          | -----  | MLSNLNPVMVFENAKEVFLISEDLKTPINITNSNSNSDGLYVIDKGDGWILGE         | 54 |
| CP2            | -----  | MLSNLNPVMVFENAKEVFLISEDLKTPINITNSNSNSDGLYVIDKGDGWILGE         | 54 |
| CP859          | -----  | MLSNLNPVMVFENAKEVFLISEDLKTPINITNSNSNSDGLYVIDKGDGWILGE         | 54 |
| F4969          | -----  | MLSNLNPVMVFENAKEVFLISEDLKTPINITNSNSNSDGLYVIDKGDGWILGE         | 54 |
| F5603          | -----  | MLSNLNPVMVFENAKEVFLISEDLKTPINITNSNSNSDGLYVIDKGDGWILGE         | 54 |
| SM101          | -----  | MLSNLNPVMVFENAKEVFLISEDLKTPINITNSNSNSDGLYVIDKGDGWILGE         | 54 |
| JP55           | -----  | MLSNLNPVMVFENAKEVFLISEDLKTPINITNSNSNSDGLYVIDKGDGWILGE         | 54 |
| VMI/JKSGR/2015 | -----  | MLSNLNPVMVFENAKEVFLISEDLKTPINITNSNSNSDGLYVIDKGDGWILGE         | 54 |
| D13122         | -----  | MLSNLNPVMVFENAKEVFLISEDLKTPINITNSNSNSDGLYVIDKGDGWILGE         | 54 |
| CP396          | -----  | MLSNLNPVMVFENAKEVFLISEDLKTPINITNSNSNSDGLYVIDKGDGWILGE         | 54 |
| 3441           | MQNTTN | MLSNLNPVMVFENAKEVFLISEDLKTPINITNSNSNSDGLYVIDKGDGWILGE         | 60 |
| CP65           | MQNTTN | MLSNLNPVMVFENAKEVFLISEDLKTPINITNSNSNSDGLYVIDKGDGWILGE         | 60 |
| PB-1           | MQNTTN | MLSNLNPVMVFENAKEVFLISEDLKTPINITNSNSNSDGLYVIDKGDGWILGE         | 60 |
|                |        | *:*. *****:*. *****. *****                                    |    |

|                |                                                              | III | II |     |
|----------------|--------------------------------------------------------------|-----|----|-----|
| 8-6            | PSVVSSQILNPNETGTFSQSLTKSKEVSINVNFSVGFTSEFIQASVEYGFGITIGEQTNI |     |    | 114 |
| B3550. 5       | PSVVSSQILNPNETGTFSQSLTKSKEVSINVNFSVGFTSEFIQASVEYGFGITIGEQTNI |     |    | 114 |
| F3686          | PSVVSSQILNPNETGTFSQSLTKSKEVSINVNFSVGFTSEFIQASVEYGFGITIGEQTNI |     |    | 114 |
| CP2            | PSVVSSQILNPNETGTFSQSLTKSKEVSINVNFSVGFTSEFIQASVEYGFGITIGEQTNI |     |    | 114 |
| CP859          | PSVVSSQILNPNETGTFSQSLTKSKEVSINVNFSVGFTSEFIQASVEYGFGITIGEQTNI |     |    | 114 |
| F4969          | PSVVSSQILNPNETGTFSQSLTKSKEVSINVNFSVGFTSEFIQASVEYGFGITIGEQTNI |     |    | 114 |
| F5603          | PSVVSSQILNPNETGTFSQSLTKSKEVSINVNFSVGFTSEFIQASVEYGFGITIGEQTNI |     |    | 114 |
| SM101          | PSVVSSQILNPNETGTFSQSLTKSKEVSINVNFSVGFTSEFIQASVEYGFGITIGEQTNI |     |    | 114 |
| JP55           | PSVVSSQILNPNETGTFSQSLTKSKEVSINVNFSVGFTSEFIQASVEYGFGITIGEQTNI |     |    | 114 |
| VMI/JKSGR/2015 | PSVVSSQILNPNETGTFSQSLTKSKEVSINVNFSVGFTSEFIQASVEYGFGITIGEQTNI |     |    | 114 |
| D13122         | PSVVSSQILNPNETGTFSQSLTKSKEVSINVNFSVGFTSEFIQASVEYGFGITIGEQTNI |     |    | 114 |
| CP396          | PSVVSSQILNPNETGTFSQSLTKSKEVSINVNFSVGFTSEFIQASVEYGFGITIGEQTNI |     |    | 114 |
| 3441           | PSVVSSQILNPNETGTFSQSLTKSKEVSINVNFSVGFTSEFIQASVEYGFGITIGEQTNI |     |    | 120 |
| CP65           | PSVVSSQILNPNETGTFSQSLTKSKEVSINVNFSVGFTSEFIQASVEYGFGITIGEQTNI |     |    | 120 |
| PB-1           | PSVVSSQILNPNETGTFSQSLTKSKEVSINVNFSVGFTSEFIQASVEYGFGITIGEQTNI |     |    | 120 |
|                | *****                                                        |     |    |     |

|                |                                                           | III | II |     |
|----------------|-----------------------------------------------------------|-----|----|-----|
| 8-6            | ERSVSTTAGPNEYVYKQYATYRKQYAIRISHGNISDGSYKLTGIWLSKTSADSLGNI |     |    | 174 |
| B3550. 5       | ERSVSTTAGPNEYVYKQYATYRKQYAIRISHGNISDGSYKLTGIWLSKTSADSLGNI |     |    | 174 |
| F3686          | ERSVSTTAGPNEYVYKQYATYRKQYAIRISHGNISDGSYKLTGIWLSKTSADSLGNI |     |    | 174 |
| CP2            | ERSVSTTAGPNEYVYKQYATYRKQYAIRISHGNISDGSYKLTGIWLSKTSADSLGNI |     |    | 174 |
| CP859          | ERSVSTTAGPNEYVYKQYATYRKQYAIRISHGNISDGSYKLTGIWLSKTSADSLGNI |     |    | 174 |
| F4969          | ERSVSTTAGPNEYVYKQYATYRKQYAIRISHGNISDGSYKLTGIWLSKTSADSLGNI |     |    | 174 |
| F5603          | ERSVSTTAGPNEYVYKQYATYRKQYAIRISHGNISDGSYKLTGIWLSKTSADSLGNI |     |    | 174 |
| SM101          | ERSVSTTAGPNEYVYKQYATYRKQYAIRISHGNISDGSYKLTGIWLSKTSADSLGNI |     |    | 174 |
| JP55           | ERSVSTTAGPNEYVYKQYATYRKQYAIRISHGNISDGSYKLTGIWLSKTSADSLGNI |     |    | 174 |
| VMI/JKSGR/2015 | ERSVSTTAGPNEYVYKQYATYRKQYAIRISHGNISDGSYKLTGIWLSKTSADSLGNI |     |    | 174 |
| D13122         | ERSVSTTAGPNEYVYKQYATYRKQYAIRISHGNISDGSYKLTGIWLSKTSADSLGNI |     |    | 174 |
| CP396          | ERSVSTTAGPNEYVYKQYATYRKQYAIRISHGNISDGSYKLTGIWLSKTSADSLGNI |     |    | 174 |
| 3441           | ERSVSTTAGPNEYVYKQYATYRKQYAIRISHGNISDGSYKLTGIWLSKTSADSLANI |     |    | 180 |
| CP65           | ERSVSTTAGPNEYVYKQYATYRKQYAIRISHGNISDGSYKLTGIWLSKTSADSLANI |     |    | 180 |
| PB-1           | ERSVSTTAGPNEYVYKQYATYRKQYAIRISHGNISDGSYKLTGIWLSKTSADSLANI |     |    | 180 |
|                | *****. *****. *****. *****. **                            |     |    |     |

|     |    |  |
|-----|----|--|
|     | II |  |
| III |    |  |

[illegible]

\*\*\*.\*\*\*\*\*. :\*\*\*\*\*:\*\*\*\*\*

TQKLNHLHTITATGQKYRILASKIVDFNIYSNNFNNLVKLEQSLGDGVKDHYVDISLDAG 294  
TQKLNHLHTITATGQKYRILASKIVDFNIYSNNFNNLVKLEQSLGDGVKDHYVDISLDAG 294  
TQKLNHLHTITATGQKYRILASKIVDFNIYSNNFNNLVKLEQSLGDGVKDHYVDISLDAG 294  
TQKLNHLHTITATGQKYRILASKIVDFNIYSNNFNNLVKLEQSLGDGVKDHYVDISLDAE 294  
TQKLNHLHTITATGQKYRILASKIVDFNIYSNNFNNLVKLEQSLGDGVKDHYVDISLDAG 294  
TQKLNHLHTITATGQKYRILASRIVDFNIYSNNFNNLVKLQESLGDGVNDHYDIDISLDAG 300  
TQKLNHLHTITATGQKYRILASRIVDFNIYSNNFNNLVKLQESLGDGVNDHYDIDISLDAG 300  
TQKLNHLHTITATGQKYRILASRIVDFNIYSNNFNNLVKLQESLGDGVNDHYDIDISLDAG 300

\*\*\*\*\* : \*\*\*\*\* : \*\*\*\*\* : \*\*\* : \*\*\*\*\*

QYVLVMKANSSYSGNYPYSILFQKF 319  
 QYVLVMKANSSYSGNYPYAILFQKF 325  
 QYVLVMKANSSYSGNY----- 316  
 QYVLVMKANSSYSGNYPYAILFQKF 325  
 \*\*\*\*\*
