# Supplementary material for: Prevalence and Genetic Diversity of Toxin Genes in Clinical Isolates of Clostridium perfringens: Coexistence of Alpha-Toxin Variant and Binary Enterotoxin Genes (bec/cpile)
Source: MDPI journal article supplement (doi:10.3390/toxins11060326), 2019-06-06
Supplement: s1 [file s1]

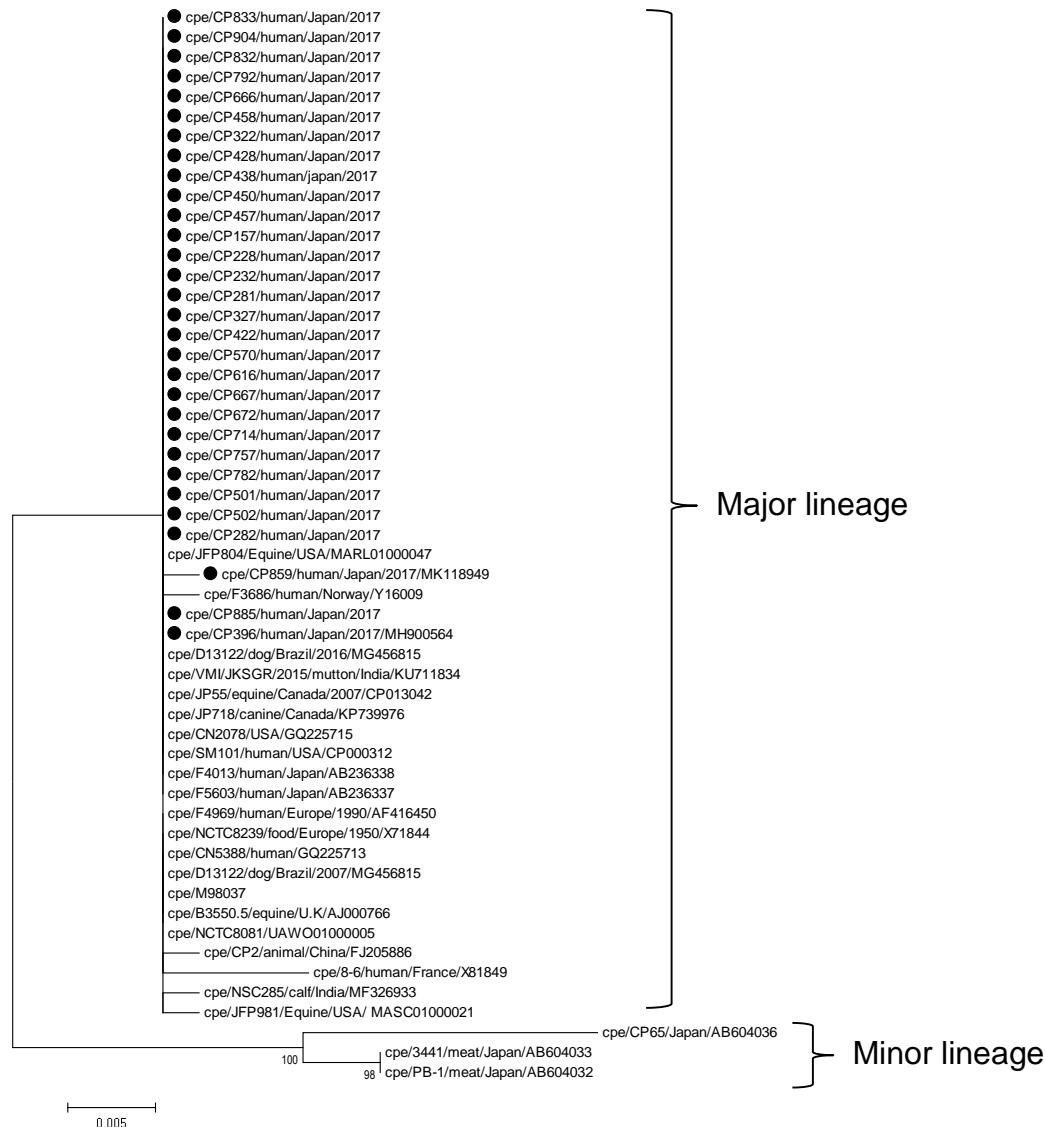

**Figure S4.** Phylogenetic dendrogram of *cpe* constructed by maximum likelihood method using MEGA7. Tree was statistically supported by bootstrapping with 1000 replicates, and genetic distances were calculated by Kimura two-parameter model. Variation scale is provided at bottom. Percentage bootstrap support is indicated by values at each node (values <80 are omitted). Lineages are shown on the right.
