# Supplementary material for: Prevalence and Genetic Diversity of Toxin Genes in Clinical Isolates of Clostridium perfringens: Coexistence of Alpha-Toxin Variant and Binary Enterotoxin Genes (bec/cpile)
Source: MDPI journal article supplement (doi:10.3390/toxins11060326), 2019-06-06
Supplement: s1 [file s1]

**Table S1 Alpha-toxin (phospholipase C) sequence types assigned to 46 *C. perfringens* isolates**

| Strain ID | amino acid position of alpha-toxin |    |    |     |     |     |     |     |     |     |     | Sequence type |
|-----------|------------------------------------|----|----|-----|-----|-----|-----|-----|-----|-----|-----|---------------|
|           | 13                                 | 54 | 57 | 166 | 202 | 205 | 244 | 362 | 363 | 365 | 373 |               |
| Strain 13 | T                                  | L  | N  | A   | D   | A   | D   | F   | P   | A   | I   | Type F*       |
| CP201     | A                                  | L  | N  | A   | D   | A   | D   | F   | P   | A   | I   | Type I        |
| CP238     | A                                  | L  | N  | A   | D   | A   | D   | F   | P   | A   | I   | Type I        |
| CP606     | A                                  | L  | N  | A   | D   | A   | D   | F   | P   | A   | I   | Type I        |
| CP501     | A                                  | M  | N  | A   | D   | A   | D   | F   | P   | A   | I   | Type IVb      |
| CP322     | A                                  | M  | N  | A   | D   | A   | D   | F   | P   | A   | I   | Type IVb      |
| CP282     | A                                  | M  | N  | A   | D   | A   | D   | F   | P   | A   | I   | Type IVb      |
| CP904     | A                                  | M  | N  | A   | D   | A   | D   | F   | P   | A   | I   | Type IVb      |
| CP648     | A                                  | M  | N  | A   | D   | A   | D   | F   | P   | A   | I   | Type IVb      |
| CP628     | A                                  | M  | N  | A   | D   | A   | D   | F   | P   | A   | I   | Type IVb      |
| CP281     | A                                  | M  | N  | A   | D   | A   | D   | F   | P   | A   | I   | Type IVb      |
| CP458     | A                                  | M  | N  | A   | D   | A   | D   | F   | P   | A   | I   | Type IVb      |
| CP457     | A                                  | M  | N  | A   | D   | A   | D   | F   | P   | A   | I   | Type IVb      |
| CP428     | A                                  | M  | S  | A   | D   | A   | D   | F   | P   | A   | I   | Type IVc      |
| CP438     | A                                  | M  | S  | A   | D   | A   | D   | F   | P   | A   | I   | Type IVc      |
| CP450     | A                                  | M  | S  | A   | D   | A   | D   | F   | P   | A   | I   | Type IVc      |
| CP157     | A                                  | M  | N  | D   | D   | A   | D   | F   | P   | A   | I   | Type IVd      |
| CP714     | A                                  | L  | N  | A   | A   | T   | D   | F   | P   | A   | I   | Type V        |
| CP885     | A                                  | L  | N  | A   | A   | T   | D   | F   | P   | A   | I   | Type V        |
| CP616     | A                                  | L  | N  | A   | A   | T   | D   | F   | P   | A   | V   | Type Vd       |
| CP672     | A                                  | L  | N  | A   | A   | T   | D   | F   | P   | A   | V   | Type Vd       |
| CP792     | A                                  | L  | N  | A   | A   | T   | D   | F   | P   | A   | V   | Type Vd       |
| CP667     | A                                  | L  | N  | A   | A   | T   | D   | F   | P   | A   | V   | Type Vd       |
| CP489     | A                                  | L  | N  | A   | A   | T   | D   | F   | P   | V   | V   | Type Ve       |
| CP88      | A                                  | L  | N  | A   | A   | T   | D   | F   | P   | V   | V   | Type Ve       |
| CP412     | A                                  | L  | N  | A   | A   | T   | D   | F   | P   | V   | V   | Type Ve       |
| CP757     | A                                  | L  | N  | A   | A   | T   | D   | F   | P   | V   | V   | Type Ve       |
| CP734     | A                                  | L  | N  | A   | A   | T   | D   | F   | P   | V   | V   | Type Ve       |
| CP666     | A                                  | L  | N  | A   | A   | T   | D   | F   | P   | V   | V   | Type Ve       |
| CP833     | A                                  | L  | N  | A   | A   | T   | D   | F   | P   | V   | V   | Type Ve       |
| CP832     | A                                  | L  | N  | A   | A   | T   | D   | F   | P   | V   | V   | Type Ve       |
| CP782     | A                                  | L  | N  | A   | A   | T   | D   | F   | P   | V   | V   | Type Ve       |
| CP706     | A                                  | L  | N  | A   | A   | T   | D   | F   | P   | V   | V   | Type Ve       |
| CP91      | A                                  | L  | N  | A   | A   | T   | D   | F   | P   | V   | V   | Type Ve       |
| CP396     | A                                  | L  | N  | A   | A   | T   | D   | F   | P   | V   | V   | Type Ve       |
| CP859     | A                                  | L  | N  | A   | A   | T   | D   | F   | P   | V   | V   | Type Ve       |
| CP301     | A                                  | L  | N  | A   | A   | T   | D   | F   | P   | V   | V   | Type Ve       |
| CP232     | A                                  | L  | N  | A   | A   | T   | D   | F   | P   | V   | V   | Type Ve       |
| CP94      | A                                  | L  | N  | A   | A   | T   | D   | F   | P   | V   | V   | Type Ve       |
| CP570     | A                                  | L  | N  | A   | A   | T   | D   | F   | P   | V   | V   | Type Ve       |
| CP502     | A                                  | L  | N  | A   | A   | T   | D   | F   | P   | V   | V   | Type Ve       |
| CP228     | A                                  | L  | N  | A   | A   | T   | D   | F   | P   | V   | V   | Type Ve       |
| CP327     | A                                  | L  | N  | A   | A   | T   | D   | F   | P   | V   | V   | Type Ve       |
| CP422     | A                                  | L  | N  | A   | A   | T   | D   | F   | P   | V   | V   | Type Ve       |
| CP400     | A                                  | L  | N  | A   | A   | T   | D   | F   | S   | A   | I   | Type Vf       |
| CP653     | A                                  | L  | N  | A   | A   | T   | Y   | I   | S   | A   | I   | Type Vg       |
| CP452     | T                                  | L  | N  | A   | D   | A   | D   | F   | P   | A   | V   | Type VIII     |

Alpha-toxin (Plc) of human *C. perfringens* strain 13 [16, 19] is shown as prototype to compare with Plc sequences of other strains, and described as "Type F" representing "first type". Amino acid substitutions compared with those of strain 13 are shown in yellow and blue, which denote those defining toxin type I, IV, V, and VIII reported previously [15], and those newly detected in the present study, respectively. 373I shown in gray indicates that this residue (isoleucine) is distinct from that in toxin type IV and IVa (valine) described by Abildgaard et al.[16] .

**Table S2** *cpb2* nucleotide sequence identity (%) (upper right) and beta2 toxin amino acid sequence identity (lower left)

| cluster   | Strain  | Sequence identity with strain |        |        |       |        |         |       |        |         |
|-----------|---------|-------------------------------|--------|--------|-------|--------|---------|-------|--------|---------|
|           |         | CP301                         | AN4361 | AG07-9 | CP412 | CWC245 | JGS1902 | CP458 | D13122 | EGY2014 |
| 1         | CP301   |                               | 98.3   | 98.9   | 94.0  | 94.4   | 72.6    | 71.9  | 74.6   | 74.8    |
|           | AN4361  | 98.3                          |        | 100.0  | 91.7  | 93.1   | 73.9    | 73.7  | 73.5   | 74.2    |
|           | AG07-9  | 98.7                          | 100.0  |        | 94.1  | 94.9   | 73.8    | 74.7  | 73.8   | 74.1    |
| prototype | CP412   | 90.2                          | 87.2   | 92.1   |       | 97.7   | 71.3    | 71.3  | 73.7   | 74.8    |
|           | CWC245  | 91.7                          | 88.4   | 92.7   | 96.6  |        | 71.7    | 71.0  | 73.6   | 74.8    |
| 2         | JGS1902 | 63.6                          | 69.2   | 67.5   | 61.0  | 62.5   |         | 97.4  | 97.2   | 95.9    |
|           | CP458   | 64.8                          | 69.2   | 71.8   | 63.4  | 63.4   | 96.5    |       | 99.3   | 98.5    |
|           | D13122  | 68.1                          | 68.6   | 67.5   | 66.4  | 66.4   | 95.6    | 98.9  |        | 99.0    |
|           | EGY2014 | 68.3                          | 69.7   | 68.1   | 68.3  | 68.3   | 93.3    | 96.7  | 97.6   |         |
|           |         |                               |        |        |       |        |         |       |        |         |

Sequence identity within a same cluster is shown in yellow (nucleotide) or pink (amino acid).

**Table S3** Primers used for PCR in the present study

| Target gene                 | Primer    | Nucleotide sequence (5'-3')  | the other primer for PCR  |
|-----------------------------|-----------|------------------------------|---------------------------|
| <i>cpe</i>                  | cpe-5p1   | GTCATGTAGAAATATATTCAAG       | +cpe-3p1, +cpe3p2         |
|                             | cpe-3p1   | GTAATATTAAATTATTACATAC       |                           |
|                             | cpe-3p2   | GAAAAATATTATCGTGATATATG      |                           |
| <i>bec</i> ( <i>cpile</i> ) | becA-5p1  | CATTTTTTAAAAATGGAGGTAAAATATG | +bec-3p1, +becBR          |
|                             | becB-3p1  | GATATTTATATATTAAAATTAAAAAGGG | +bec-AF                   |
|                             | bec-BR    | AGATTGGAGCAGAGCCAGAA         |                           |
|                             | bec-AF    | CAATGGGGCGAAGAAAATTA         | +becB-1, +bec-3p1         |
|                             | becB-1    | CTTTTCCCCTTGATGGATCATC       | +bec-BF                   |
|                             | bec-BF    | TGCAAATGACCCCTTACACTGA       |                           |
| <i>cpb2</i>                 | cpb2-F2   | ATGAAAAAAATTATTTCAAAG        | +cpb2-R2                  |
|                             | cpb2-R2   | CTTCATATTTTTTCTATGCAC        |                           |
|                             | cpb2-R    | GCAGAAATCAGGATTTTGACCA       | +cpb2-L, +cpb2-L2         |
|                             | cpb2-L    | CAAGCAATTGGGGGAGTTTA         |                           |
|                             | cpb2-L2   | AGTCCAATGAAAGCAAGTGC         |                           |
|                             | cpb2-F4   | TTCAGGGGGGAATATAAATG         | +cpb2-R3                  |
|                             | cpb2-R3   | TTAGTTGTTGGTTAGGATCA         |                           |
| <i>plc</i>                  | plc-F1    | TTCAGTGCAAGTGTTAATCG         | +plc-R1, +plc-R2, +plc-R4 |
|                             | plc-R1    | GCTTTTATTTTGTAAATACCACC      |                           |
|                             | plc-R2    | CTTCTCTGCAAAAGTCTCA          |                           |
|                             | plc-R4    | CTTTTATTATTTTATATTATAAGTTG   |                           |
|                             | plc-F2    | GGCTATGCACTATTTTGGAG         | +plc-R1, +plc-R3, +plc-R4 |
|                             | plc-R3    | CCAAAACCAATAATTATTTTTTTAC    |                           |
| <i>netB</i>                 | netB-5p1  | GACCAGTTTACCAAAGTTATTG       | +netB-3pR1                |
|                             | netB-3pR1 | CTTTGATTAACTTGTAAGAAATC      |                           |

**Table S4 GenBank accession numbers assigned for *C. perfringens* toxin genes analyzed in the present study**

| Strain ID | gene (s)    |            |            |                     |             |
|-----------|-------------|------------|------------|---------------------|-------------|
|           | <i>cpb2</i> | <i>cpe</i> | <i>plc</i> | <i>bec (cpile )</i> | <i>netB</i> |
| CP157     |             |            | MH900560   |                     |             |
| CP228     |             |            | MH900561   |                     |             |
| CP301     | MH900541    |            |            |                     |             |
| CP322     |             |            | MH900563   |                     |             |
| CP327     |             |            | MH900562   |                     |             |
| CP396     | MH900543    | MH900564   |            |                     |             |
| CP400     |             |            | MH900556   |                     |             |
| CP412     | MH900542    |            |            |                     |             |
| CP428     | MH900548    |            |            |                     |             |
| CP438     | MH900544    |            |            |                     |             |
| CP450     | MH900545    |            | MH900558   |                     |             |
| CP452     | MH900546    |            | MH900551   |                     |             |
| CP457     | MH900547    |            | MH900559   |                     |             |
| CP458     | MH900549    |            |            |                     |             |
| CP606     | MH920601    |            | MH900552   |                     |             |
| CP648     | MH900550    |            |            |                     |             |
| CP653     |             |            | MH900557   | MH900565            |             |
| CP672     |             |            | MH900554   |                     |             |
| CP832     |             |            | MH900555   |                     |             |
| CP885     |             |            | MH900553   |                     |             |
| CP859     |             | MK118949   |            |                     |             |
| CP201     |             |            | MK902768   |                     | MK902770    |
| CP238     |             |            | MK902769   |                     | MK902771    |
